# Supplementary material for: Colluvium supply in humid regions limits the frequency of storm-triggered landslides
Source: PubMed Central journal article supplement (PMC5043370; doi:10.1038/srep34438), 2016-09-30
Supplement: srep34438-s1.pdf [file srep34438-s1.pdf]

1 **Title: Colluvium supply in humid regions limits the frequency of storm-**  
2 **triggered landslides**

3 **Authors:** Robert N. Parker<sup>1\*</sup>, Tristram C. Hales<sup>1</sup>, Simon M. Mudd<sup>2</sup>, Stuart W. D. Grieve<sup>2</sup>, José  
4 A. Constantine<sup>1</sup>

5 **Supporting Information**

6 **Study area**

7 Our field site is located in Macon County (1,347 km<sup>2</sup>), North Carolina, U.S.A., part of the  
8 Southern Appalachian Mountains. The whole range is soil-mantled, with upland hillslopes  
9 characterized by the nose and hollow topography typical of Appalachian regions<sup>1</sup>. The geology  
10 of Macon County is composed of high and moderate grade metamorphic rocks in a structurally  
11 complex arrangement that crosses topography<sup>2</sup>. The mountain range is tectonically quiescent,  
12 with some debate as to the timing of late stage uplift of the mountains<sup>3</sup>. Regardless of their  
13 genesis, the mountains maintain high relief of close to 1000 m through high topographic features  
14 such as the Blue Ridge and Nantahala Escarpments, resulting in the steep topography necessary  
15 to generate significant landsliding. The soil mantle is maintained by a humid, sub-tropical  
16 climate at lower elevations and marine, humid, temperate climate at higher elevations, with mean  
17 annual precipitation ranging between 1800 and 2300 mm for elevations between 700 and  
18 1400m<sup>4</sup>.

19 Current forests in the landslide prone higher elevations of the Southern Appalachians are  
20 dominated by either northern hardwoods, or a combination of xeric oak-pine, cove and mixed  
21 hardwood forests<sup>5</sup>. The current forest structure is thought to have been established at close to its  
22 current elevation distribution by the mid-Holocene<sup>6</sup>. Prior to this, more extensive northern  
23 hardwood forests existed, and during the last glacial maximum the highest peaks are likely to  
24 have been dominantly periglacial<sup>7</sup>. Empirical observations of root reinforcement of soils have  
25 shown that there is a difference in the strength of soils between noses and hollows<sup>8</sup>. Root  
26 reinforcement within individual hollows is highly variable<sup>8-10</sup> due primarily to differences in  
27 root biomass of different tree species, and within individual tree species as a function of age,  
28 substrate, nutrient contents and other factors. There is no regional pattern in root reinforcement

29 provided by the dominant forest types in the Appalachians<sup>8</sup>. However, there may be significant  
30 uncertainty in the root strength of an individual hollow, which we constrain within our model.  
31 Because there is no obvious regional trend in root reinforcement across the forest types of the  
32 Southern Appalachians, we infer that forest change alone does not cause significant differences  
33 in root reinforcement through time. The later 19<sup>th</sup> and early 20<sup>th</sup> century saw extensive  
34 deforestation in this area both by clearfelling and selective logging<sup>11</sup>. However, the only study of  
35 deforestation effects showed no difference in landslide initiation rates between clearfelled and  
36 natural forests, suggesting that clearfelling did not significantly increase the proportion of the  
37 landscape susceptible to landsliding<sup>12</sup>.

38 Landslides have been recorded in the southern and central Appalachians for over a century<sup>13</sup>.  
39 Hundreds of landslides have been associated with large cyclonic storms in North Carolina,  
40 Virginia and West Virginia between 1916 and 2007. Tens of landslides across Macon County  
41 were associated with 2004 Hurricanes Ivan and Frances. The resulting investigation by the North  
42 Carolina Geological Survey (NCGS) led to a 2-year-long historical, remote sensing, and field  
43 study that created an extensive landslide inventory for the area<sup>14-16</sup>. Field measurements of  
44 recently failed landslides (2003-2013) were used as part of our dataset of soil information.

#### 45 **Soil depth measurements**

46 We calculated the distribution of current hollow colluvium thicknesses in the field using a  
47 combination of soil pits and soil tile probe measurements. We randomly chose hollows to survey  
48 by examining areas of convergent topography with potential in the categories Lower bound  
49 instability, Upper bound instability, Unconditionally unstable, from SINMAP analysis  
50 undertaken by the NCGS<sup>15</sup>.

51 In order to measure the depth of colluvium in large numbers of hollows, we developed a field  
52 methodology using a 2.5 meter long, AMS soil tile probe ([http://www.benmeadows.com/ams-heavy-duty-extendible-tile-probe\\_36814889/](http://www.benmeadows.com/ams-heavy-duty-extendible-tile-probe_36814889/)). This is a reinforced steel rod that can be driven  
53 by hand into rugged soils, to attain a bedrock refusal depth. Depths were measured vertically and  
54 rotated normal to the hillslope surface using the local slope gradient. The technique provides an  
55 accurate estimate of colluvium depth in soft soil with a discrete bedrock interface. However,  
56 underestimates occur where the probe strikes hard clasts in the soil column, and overestimates  
57

58 occur where the probe penetrates into bedrock fractures or zones of rock that have weathered to  
59 saprolite. We developed a methodology with three levels of accuracy for measuring soil depth.

60 At each site we first probed the soil around the apex of the hollow, to find the area of deepest  
61 colluvium. Excavating a pit in the hollow apex, down to the bedrock, attained the most accurate  
62 and definitive measure of soil depth. The soil thickness from the soil surface to the bedrock  
63 interface was then measured using a tape measure. Accounting for uneven soil and bedrock  
64 surfaces, we estimate the accuracy of this technique to be  $\sigma = \pm 0.02$  m.

65 Using the soil tile probe, our most accurate measure of soil depth was attained from the  
66 maximum of 20 probe depths, collected in a 1x1 m sample zone in the apex of the hollow (  
67  $h_{probe_{20max}}$ ). Monte Carlo analysis using data from our pilot study indicated that this technique  
68 should provide 95% confidence that the depth measurement was within 10% of the actual soil  
69 depth. We assessed the final accuracy and precision of this method through comparison of these  
70 data with the depth of colluvium measured definitively in excavation pits (at 16 sites), using  
71 regression analysis (Extended Data Fig. 3). On average our  $h_{probe_{20max}}$  data overestimate the  
72 colluvium depth by 5%, and we attain a standard deviation of residuals of 0.33 m:

73 (1)

74 
$$h = 0.95h_{probe_{20max}} \pm \sigma = 0.33$$

75 Our coarsest, reconnaissance level measure of soil depth was attained by taking the maximum of  
76 3 probe depths, within a 1x1 m sample zone in the hollow apex ( $h_{probe_{3max}}$ ). We assess the  
77 uncertainty for these sites through Monte Carlo simulation of our methodology, inverse-  
78 transform sampling the maximum of 3 depths from data at the same 16 pit sites. Our results  
79 suggest that the  $h_{probe_{3max}}$  data underestimate the colluvium depth by 15%, and for these sites we  
80 attain a standard deviation of residuals of 0.37 m.

81 (2)

82 
$$h = 1.17h_{probe_{3max}} \pm \sigma = 0.37$$

83 Using (1) and (2), we transformed our probe depth data, to estimate the depth and depth  
84 uncertainty for each hollow.

## 85 Critical Soil Depth Measurements

86 Critical soil depths ( $h_{cr}$ ) were calculated using the Mohr-Coulomb failure criterion solved for  
87 depth and assuming full soil saturation,

88 (3)

$$89 \quad h_{cr} = \frac{c}{\gamma_w \tan \phi \cos \beta + \gamma_{sat} \cos \beta (\tan \beta - \tan \phi)} .$$

90 where  $c$  is the soil and root cohesion,  $\gamma_w$  is the weight of water,  $\gamma_{sat}$  is the saturated weight of soil,  
91  $\phi$  is the friction angle, and  $\beta$  is the slope of the hollow<sup>17</sup>. We determined the key parameters from  
92 field and laboratory observations and using a digital elevation model:

93 *Root cohesions* ( $c$ ) were determined by analyzing the diameter distribution and tensile strength of  
94 roots collected in pits excavated in Coweeta Hydrologic Laboratory<sup>8,18</sup>. Using the Wu method<sup>19</sup>  
95 we determined the lateral cohesion at each pit.

96 *Soil cohesion and friction angles* ( $\phi$ ) were measured for two soil pits in Coweeta Hydrologic  
97 Laboratory<sup>8</sup>. Samples were triaxially tested by the North Carolina Department of Transport and  
98 parameters were calculated based on the stress path methodology.

99 *Saturated weight of soil* ( $\gamma_{sat}$ ) was measured during the emplacement of time-domain reflectivity  
100 probes following the methods of Amoozegar<sup>20</sup>.

101 *Hollow axis gradients* ( $\beta$ ) were constrained using a 6 m resolution LiDAR-derived digital  
102 elevation model<sup>21</sup>. Landscape gradients were derived at the DEM resolution by calculating the  
103 maximum gradient between each 6 m pixel and its 8 neighbouring pixels. We attained  $\beta$  from the  
104 DEM gradient at the GPS location (accurate to <6 m) of each sample site.

105 The rate of soil accumulation in hollows is determined by the ratio of *hollow axis gradient* to the  
106 *hollow side-slope gradient* and the soil creep transport coefficient ( $D$ ) (see (5) below). *Hollow*  
107 *side-slope gradients* ( $\alpha$ ) were attained by taking the hypotenuse (Euclidean maximum) of the  
108 hollow axis gradient ( $\beta$ ), and the slope gradient measured perpendicular to the hollow axis. Note  
109 that for hollows, by definition,  $\alpha$  is always greater than  $\beta$ , so we report this variable in terms of  
110 a  $\beta/\alpha$  hollow concavity ratio.



111 *Soil creep transport coefficient (D)* values for the Southern Appalachians have been estimated at  
112 6.5-10 m<sup>2</sup> ka<sup>-1</sup><sup>22</sup>, based on in-situ and meteoric <sup>10</sup>Be analysis of hillslope soils<sup>23</sup>.

113 To assess the uncertainty in critical soil depth measurements we used the Monte Carlo Method.  
114 We randomly sampled the distributions of input variables (Extended Data Fig. 4 A-E) using  
115 inverse transform sampling. This technique interpolates between quantiles of our sampled data,  
116 allowing us to generate continuous random variables without being restricted to the sample  
117 values.

### 118 **One-dimensional Model of Hollow Infilling and Evacuation**

119 We modelled infilling and evacuation for a synthetic population of 1000 hollows (Extended Data  
120 Fig. 2 & 3) with characteristics derived randomly from our field and DEM parameters (Extended  
121 Data Fig. 4 A-E). We model infilling and evacuation in colluvial hollows in one-dimension using  
122 a model developed by Dietrich et al.<sup>24</sup> and D'Odorico and Fagherazzi<sup>25</sup>. This model simplifies  
123 hollow geometry and hydrology by assuming that there is little change in slope along the hollow  
124 axis, therefore soil accumulation is determined by the difference in side-slope and hollow  
125 gradients. This model is preferred over more complicated models of hollow infilling and  
126 evacuation because the result is a measure of soil depth that can be directly compared to our data.  
127 The model estimates the soil depth for a population of hollows based on two components: i) the  
128 growth of colluvial deposits via weathering of underlying bedrock and hillslope sediment  
129 transport processes, ii) downslope evacuation of colluvium during landslides, promoted by pore-  
130 pressure generation during rainstorms.

131 The growth of colluvial deposits in hollows is modelled assuming soil creep is linearly  
132 proportional to the topographic gradient. Given a hollow where sediment enters from side slopes  
133 and leaves along the hollow axis<sup>23</sup>, this results in:

134 (4)

135 
$$\frac{dh}{dt} = \frac{K}{2h},$$

136 and

137

(5)

138

$$K = 2D \cos \beta (\tan^2 \alpha - \tan^2 \beta),$$

139 where  $h$  is the colluvium depth (measured perpendicular to the bedrock),  $t$  is time,  $\beta$  is the  
 140 hollow axis gradient and  $\alpha$  is the hollow side-slope gradient measured along the soil-bedrock  
 141 interface, and  $D$  is the sediment transport coefficient<sup>26</sup>. Assuming that the underlying hollow  
 142 bedrock geometry does not vary substantially with time,  $\beta$  and  $\alpha$  remain constant<sup>25</sup>. The cross  
 143 sectional shape of each by each hollow is assumed to be triangular and colluvium thickness  
 144 increases as

145

(6)

146

$$h = \sqrt{Kt}.$$

147 Soil production by bedrock weathering beneath the hollow is assumed to be negligible with  
 148 respect to infilling via soil diffusion from the hollow side-slopes<sup>24</sup>. When hollows fail, landslide  
 149 events scour the colluvium down to bedrock, such that  $h = 0$ . This assumption is supported by  
 150 observational evidence that shallow landslide failure surfaces generally coincide with the  
 151 regolith-bedrock interface<sup>27-29</sup>.

152 The stability of colluvium accumulated in hollows is modelled using the Mohr-Coulomb failure  
 153 criterion applied to an infinite planar slope<sup>30</sup>. This one-dimensional technique is widely used as  
 154 a geotechnical component in geomorphic and landscape evolution models. The infinite slope  
 155 assumption is generally considered valid for natural landslides, where the landslide length is long  
 156 relative to the depth<sup>31</sup>. Uncertainty analyses suggest that where length-depth ratios exceed 25,  
 157 stability (factor of safety) predictions from more physically accurate finite-element models  
 158 converge within 5% of those from the infinite slope method<sup>32</sup>. This criterion is therefore  
 159 applicable to shallow landslides in colluvial hollows, and provides an appropriate level of  
 160 accuracy for assessing hollow behavior at the regional-scale. Additionally, more accurate models  
 161 are not justified, due to the lack of knowledge on the soil geotechnical and hydrological  
 162 properties and their spatial variability<sup>33</sup>. The form of the infinite-slope model used and the  
 163 implications for hollow behavior discussed below, are specific to soils with cohesion. The  
 164 apparent cohesion provided by roots is also necessary to explain the presence of slopes greater  
 165 than maximum values of  $\phi$  observed in Appalachian soils. We take the approach of many other

166 authors (e.g. Schmidt et al., 2001<sup>34</sup>) and calculate the additional cohesion provided by roots as  
167 the lateral cohesion provided by root penetrating the soil column. Thus, the use of this model is  
168 valid for the study of shallow landslides in our field area.

169 For each hollow we calculate the critical failure depths for partially saturated soils ( $h_{crp}$ ) for a  
170 particular percentage soil saturation; the height of the water-table as a fraction of the soil  
171 thickness above the bedrock interface ( $m$ ).

172 (7)

173 
$$h_{crp} = \frac{c}{m\gamma_w \tan \phi \cos \beta + \gamma_{sat} \cos \beta (\tan \beta - \tan \phi)}$$

174 Here it is assumed that the subsurface flow is uniform with hydraulic gradient corresponding to  
175 the topographic slope. The hydrologic model that we infer is the standard model that forms the  
176 basis of most shallow landslide models<sup>25,35</sup>. Measurements of high exfiltration pressures in a  
177 shallow landslide in Coos Bay, Oregon suggest groundwater pressures may affect this  
178 condition<sup>36</sup>, however, no shallow landslide model parameterizes the bedrock exfiltration pressure  
179 component of pore pressure. Assuming that saturated overland flow takes place when the height  
180 of the water column exceeds the soil depth, the saturated depth cannot be greater than the  
181 colluvium thickness, such that when  $h < h_{cr}$ , the colluvium is always stable. The maximum soil  
182 depth ( $h_{max}$ ) is the depth of colluvium at which a hollow will become unstable regardless of pore  
183 pressure state. However,  $h_{max}$  is only relevant to the behavior of hollows with  $\beta > \phi$ , where an  
184 increase in colluvium depth favors instability of the slope. Where  $\beta \leq \phi$ , an increase in colluvium  
185 thickness favors slope stability and  $h_{max}$  is infinite. In other words, the saturated soil depth  
186 required to trigger failure increases as the soil thickens.

187 **Influence of changes in storm frequency on landslide frequency using a steady-state**  
188 **hydrologic model**

189 To further support our findings, we also include results generated using a fully-implemented  
190 steady-state hydrologic model, across a subset catchment (Coweeta Long-term Ecological  
191 Research Laboratory) using a sample of 6068 hollows delineated from 1m LiDAR topographic  
192 data, using the DrEICH algorithm<sup>37</sup>. After D’Odorico and Fagherazzi (2003)<sup>38</sup>, the precipitation  
193 into a hollow is equated to the outgoing subsurface flow occurring through the saturated depth:

194

195

(8)

196

$$RA = H_{sat}^2 K_{sat} \sin \beta \frac{1}{\tan \delta}$$

197

198 where  $R$  is the rainfall intensity,  $K_{sat}$  is the hydraulic conductivity ( $K_{sat} \sin \beta$  is the specific  
199 discharge of the subsurface flow (Darcy's law in the assumption of uniform flow),  $A$  is the  
200 hollow catchment area, and  $\tan \delta$  represents the ratio of saturated height to width at the  
201 triangular outlet of the hollow ( $\delta$  is the slope gradient at  $90^\circ$  to the hollow axis). The saturated  
202 depth can be then expressed as:

203

204

(9)

205

$$H_{sat} \sqrt{\frac{RA}{K_{sat} \sin \beta \frac{1}{\tan \delta}}}$$

206

207  $K_{sat}$  was set to  $65 \text{ md}^{-1}$  (after <sup>39</sup>), which results in a long-term distribution of modelled landslide  
208 potential consistent with that observed in hollows where we measured colluvium depth.  
209 Although  $K_{sat}$  exhibits a high level of natural variability, and ranges over several orders of  
210 magnitude for soils of different textures, this value provides a calibration of landslide potential  
211 consistent with our observations, and therefore appropriate for testing the sensitivity of landslide  
212 potential and frequency to increases in precipitation.

213

214 To test the sensitivity of landslide potential and frequency to a 10% increase in precipitation  
215 event frequency, we first generated synthetic annual maximum precipitation events from a  
216 locally observed 75-year daily precipitation record (Fig. 7A) and elevation-dependent conversion  
217 ratios<sup>40</sup>. The distribution of daily precipitation intensities is expressed as a gamma function fitted  
218 to the observed data, which we find to best characterise the observed data out of all available  
219 continuous distributions (<http://docs.scipy.org/doc/scipy-0.16.0/reference/stats.html>, Fig. 7B).  
220 The synthetic timeseries of largest annual storms was then generated by taking the maximum of  
221 365 randomly selected daily precipitation intensities for each year. This distribution corresponds  
222 closely with the observed distribution of annual maximum daily intensities between 1937 and

223 2012, suggesting that this technique provides a reasonable representation of long-term  
224 precipitation patterns in this landscape (Fig. 7C).

225

226 Using the same parameters as in our simplified simulations, we then ran the model for a spin up  
227 period of 300,000 years to allow landslide frequency and landslide potential variables to  
228 stabilize. For a further 40,000 years, we first continued the simulation with no change in  
229 precipitation frequency (Fig. 8A). Then, using the same precipitation event series, we reran the  
230 simulation for the last 40,000 years, but decreased the model time step by 10%, to simulate a  
231 10% increase in precipitation frequency (Fig. 8B). Comparing the results, we find that a 10%  
232 increase in precipitation event frequency results in a 0.1% reduction in landslide potential and a  
233 corresponding 0.3% increase in landslide frequency. At the upper limit of the projected shift to a  
234 wetter future climate, this 10% increase in frequency is combined with an 11% increase in  
235 precipitation intensity. In response to this change we see a 0.9% reduction in landslide potential  
236 and a corresponding 1.4% increase in landslide frequency (Fig. 8C). Despite the increase in long-  
237 term landslide frequency, we also find that the maximum or peak numbers of landslides triggered  
238 by individual storms are reduced, as more frequent, larger storms increasingly limit the  
239 accumulation of surplus landslide potential in the landscape.

240

241

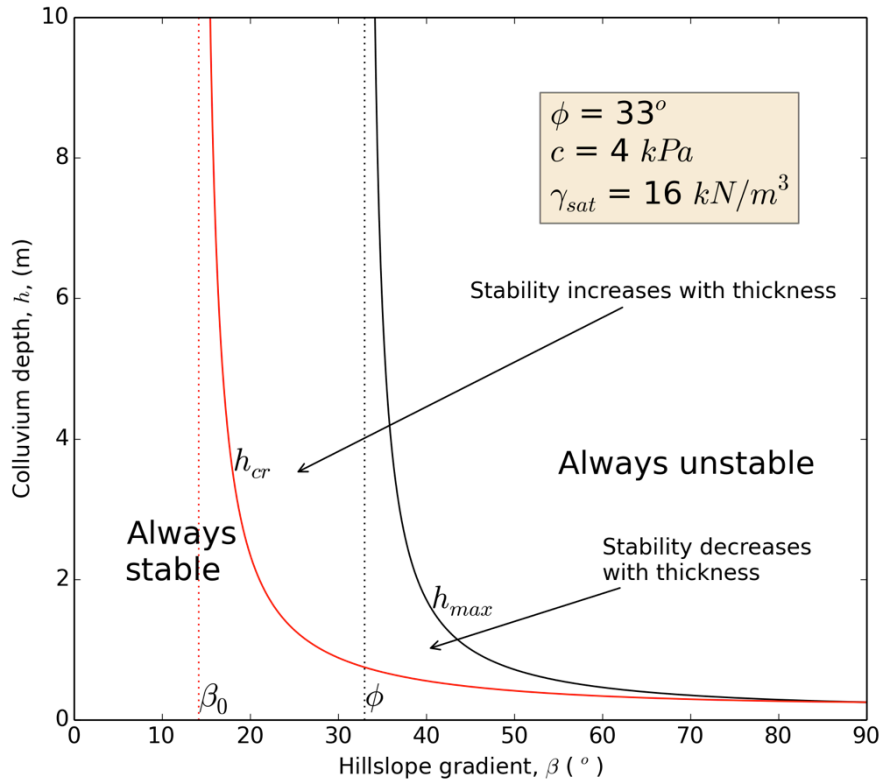

242

243 **Fig. 1.** Slope stability as a function of slope gradient and colluvium depth, for some typical  
 244 Appalachian soil strength parameters.

245

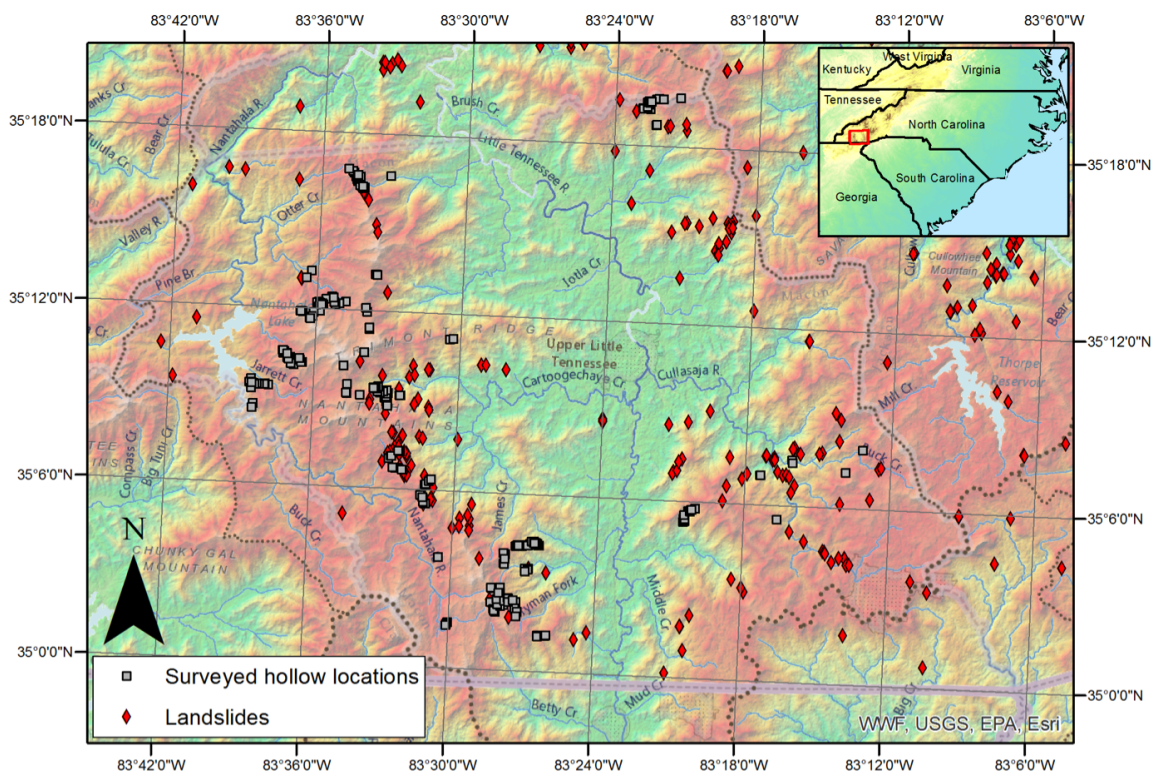

246

247 **Fig. 2.** Field area relief map of Macon County, North Carolina (USA), showing locations of 257  
 248 surveyed hollows and 52 shallow landslides from the North Carolina landslide database<sup>41</sup>. Map  
 249 was generated using ArcMap 10.2.1 (<http://desktop.arcgis.com/en/arcmap>).

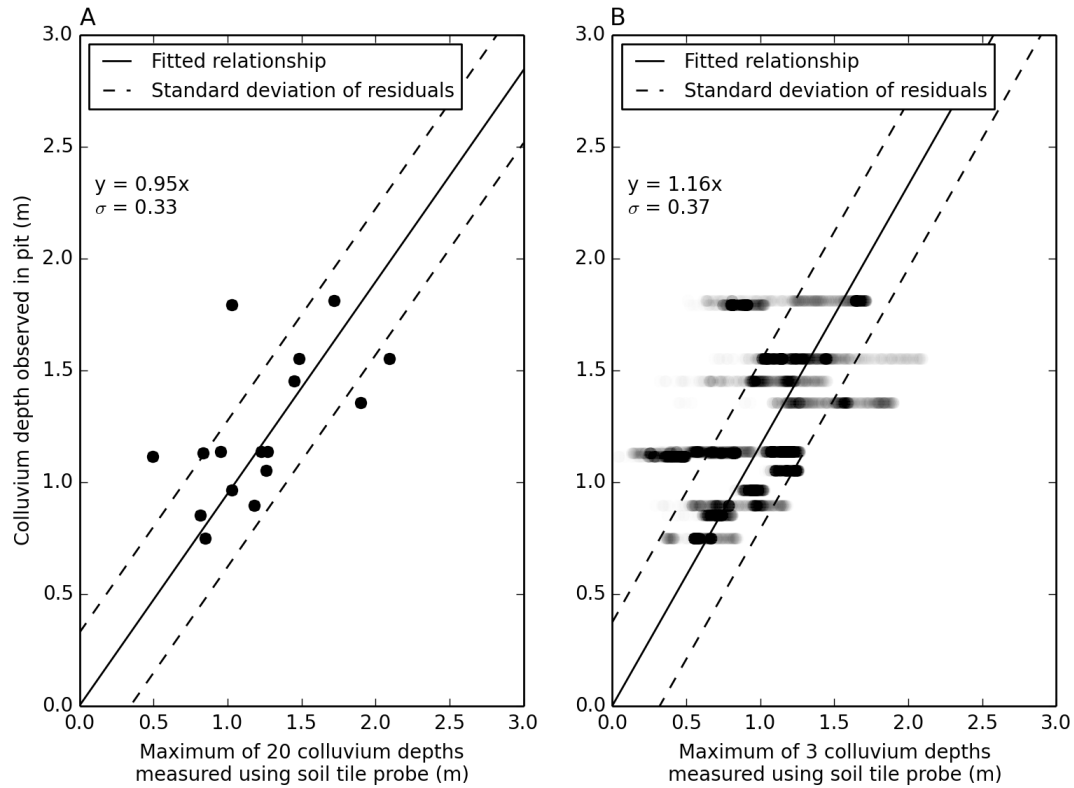

250

251 **Fig. 3** Uncertainty of soil-tile-probe-estimated colluvium depths, as a function of definitive  
 252 colluvium depths measured in excavation pits. A) Data attained from the maximum of 20 probed  
 253 depths, B) Data attained from the maximum of 3 probed depths (generated via Monte Carlo  
 254 simulation using data shown in A).



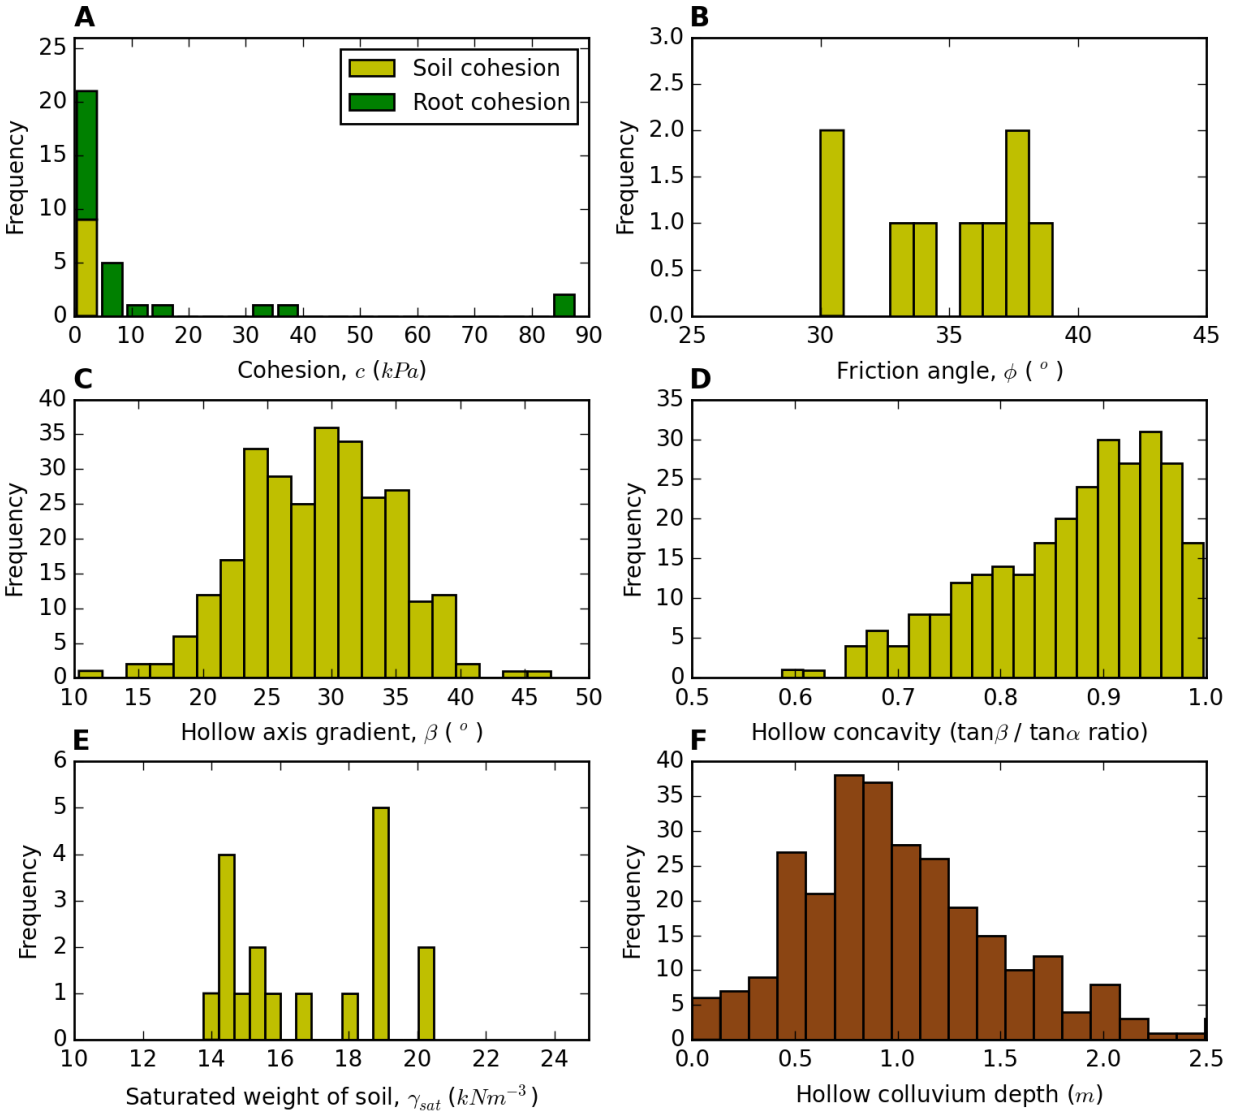

255

256 **Fig. 4.** Model input distributions of hillslope material properties, hollow geometry and colluvial  
 257 depths constrained for Appalachian colluvial hollows. Note that the use of a hollow concavity  
 258 variable allows the gradient of hollow side-slopes to be expressed as a function of the hollow  
 259 axis gradient, where the hollow concavity is the ratio of the hollow axis gradient to the hollow  
 260 side-slope gradient. In this way these two components of the hollow geometry – axis and side-  
 261 slope gradients - are varied co-dependently rather than independently, producing distributions of  
 262 hollow geometries consistent with our observed hollows.

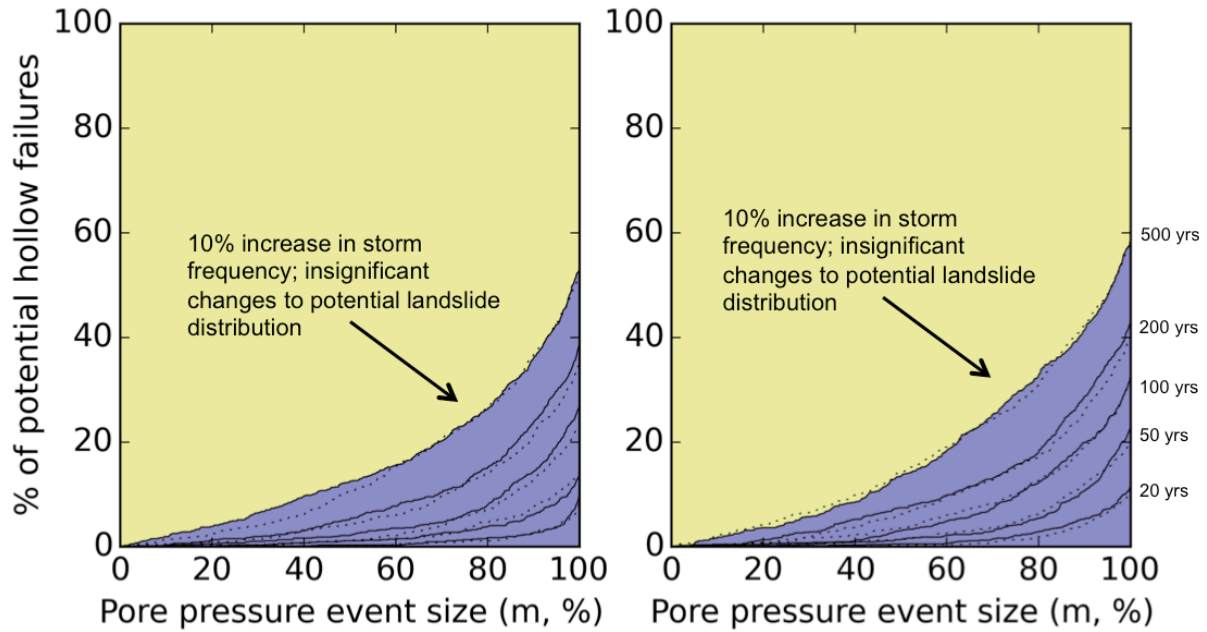

263

264 **Fig. 5.** Plots of landslide potential as a function of pore pressure event size, for upper and lower

265 bound estimates of soil creep transport coefficient ( $D$ ) for the Southern Appalachian

266 Mountains<sup>23</sup>. Using the same return periods as shown in Fig. 3. (A)  $D = 6.5$ . (B)  $D = 10.0$ .

267

**A**

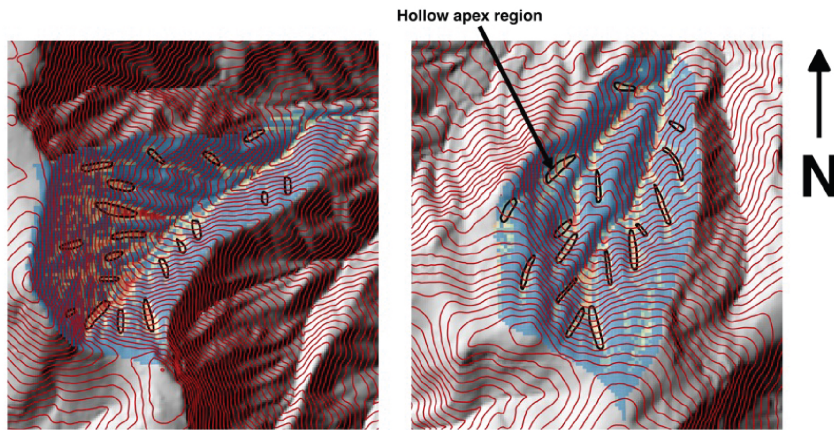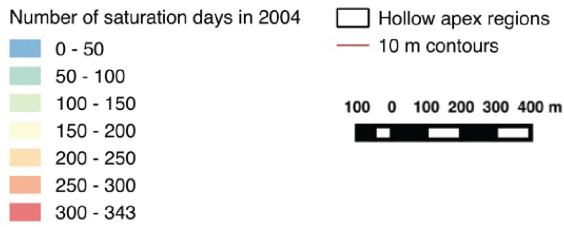

**B**

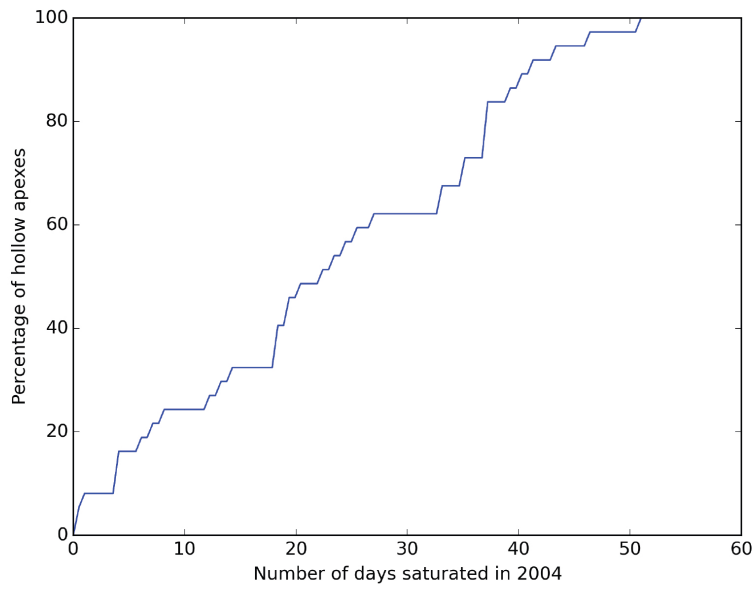

269  
270  
271  
272  
273  
274  
275  
276  
277

**Fig. 6:** A: Maps of the number of soil saturation days for two Southern Appalachian catchments in our study area, derived from ecohydrological modelling using RHESSys for 2004, when landslide-producing Hurricanes Francis and Ivan occurred<sup>40</sup>. Hollow apex regions have been mapped through interpretation of 1 and 6 m LiDAR topographic data. Maps were generated using QGIS 2.12.0-Lyon (<https://www.qgis.org>). B: Cumulative distribution of the number of days on which hollow apex regions are completely saturated. During 2004, 95 % of hollow axes display full saturation.

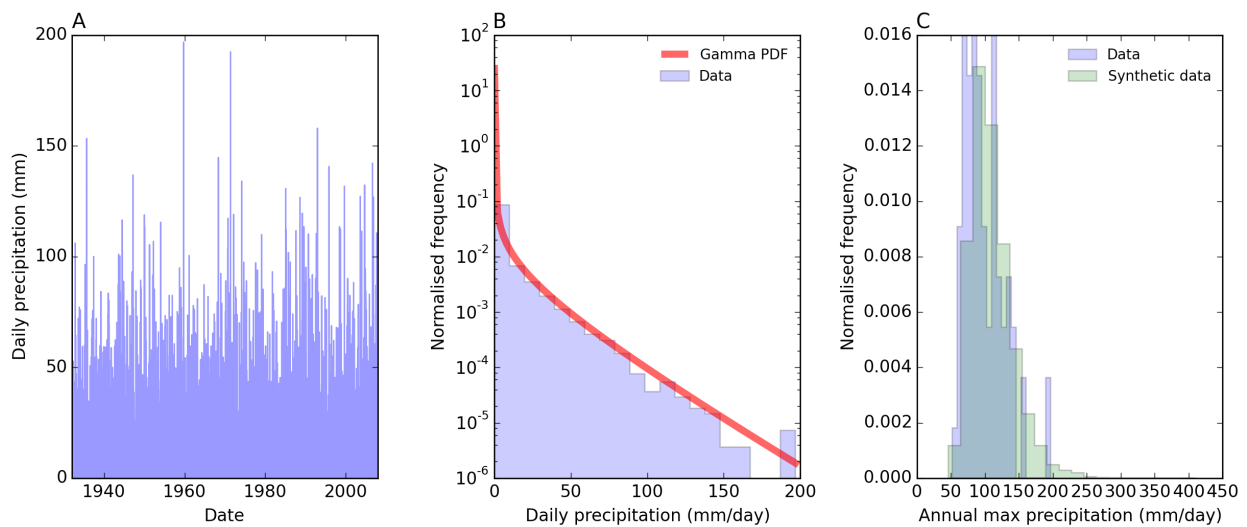

278  
279  
280  
281  
282  
283  
284  
285

**Fig. 7:** Precipitation data used in model simulations. A) Daily precipitation record taken from the Coweeta LTER from 1937 to 2012. (<http://climhy.lternet.edu/plot.pl>) B) Distribution of daily precipitation from A, showing a fitted gamma distribution. C) Synthetic annual maximum daily precipitation distribution, generated from the gamma distribution shown in B, with observed maximum annual daily precipitations shown for comparison.

**A**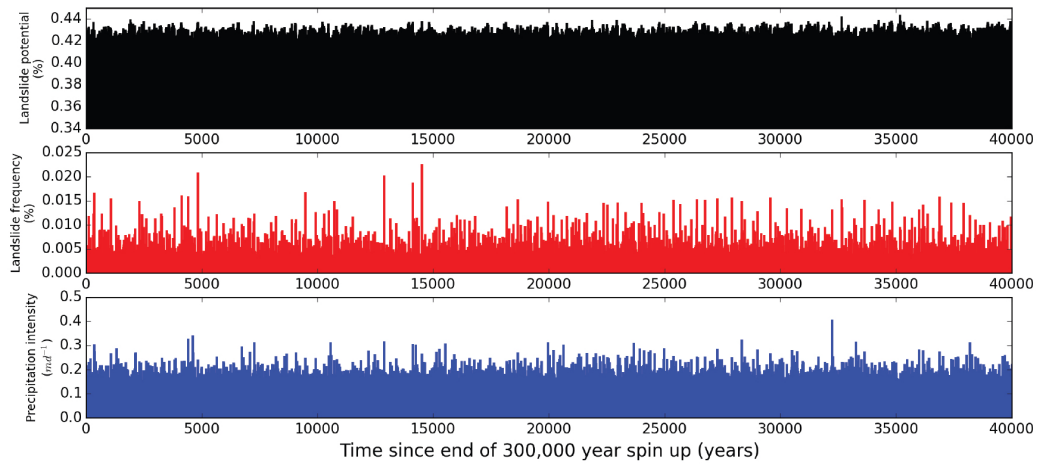**B**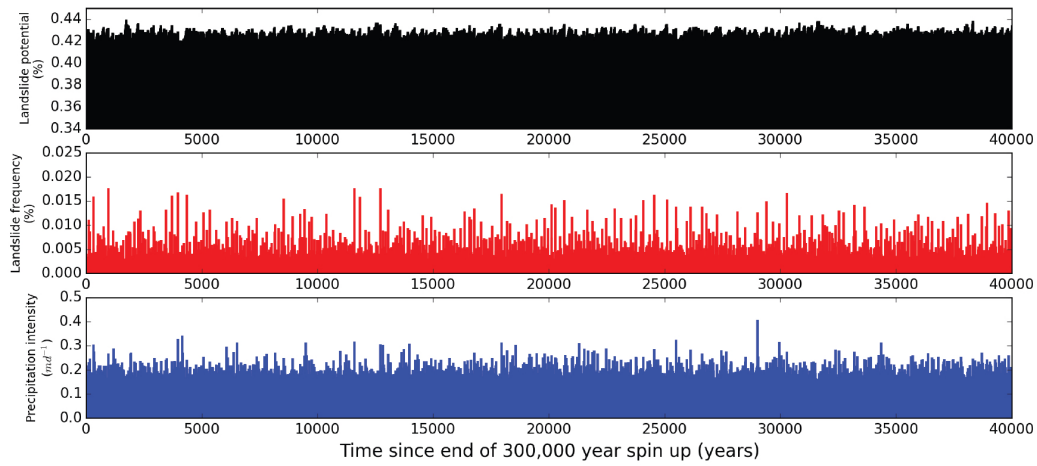**C**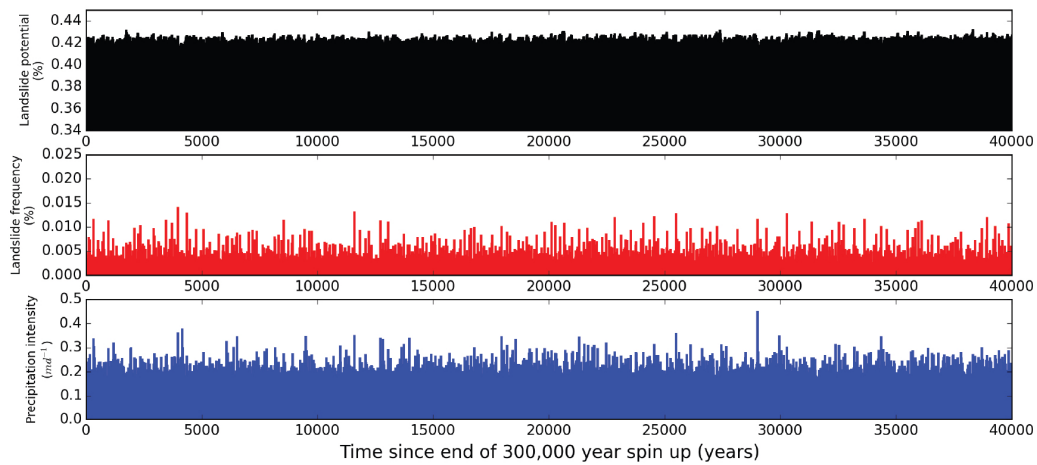

287

288 **Fig. 8:** A: Timeseries of synthetic precipitation events, landslide frequency and landslide  
289 potential. B: Same timeseries as in A, with a 10 % decrease in model time-step, to simulate a 10  
290 % increase in precipitation event frequency. C: Same timeseries as in A, with a 10 % decrease in  
291 model time-step to simulate a 10 % increase in precipitation event frequency, and an 11 %  
292 increase in model precipitation intensity.

293

#### 294 **References and Notes:**

- 295 1 Hack, J. T. & Goodlett, J. C. Geomorphology and forest ecology of a mountain region in  
296 the central Appalachians. *USGS Professional Paper* **347**, 66 (1960).
- 297 2 Hatcher, R. D. The Coweeta Group and Coweeta syncline: Major features of the North  
298 Carolina-Georgia Blue Ridge. *Southeastern Geology* **21**, 17-29 (1979).
- 299 3 Gallen, S. F., Wegmann, K. W. & Bohnenstiehl, D. R. Miocene rejuvenation of  
300 topographic relief in the southern Appalachians. *GSA Today* **23**, doi:  
301 10.1130/GSATG1163A.1131 (2013).
- 302 4 Swift, L. W., Cunningham, G. B. & Douglass, J. E. in *Forest Hydrology and Ecology*  
303 (eds W.T. Swank & D.A. Crossley) 35-55 (Springer, 1988).
- 304 5 Bolstad, P. V., Swank, W. T. & Vose, J. M. Predicting Southern Appalachian overstory  
305 vegetation with digital terrain data. *Landscape Ecology* **13**, 271-283 (1998).
- 306 6 Delcourt, H. R. Late Quaternary vegetation history of the eastern Highland Rim and  
307 adjacent Cumberland Plateau of Tennessee. *Ecological Monographs* **49**, 255-280 (1979).
- 308 7 Nelson, K. J. P., Nelson, F. E. & Walegur, M. T. Periglacial Appalachia: paleoclimatic  
309 significance of blockfield elevation gradients, eastern USA. *Permafrost and Periglacial*  
310 *Processes* **18**, 61-73 (2007).
- 311 8 Hales, T. C., Ford, C. R., Hwang, T., Vose, J. M. & Band, L. E. Topographic and  
312 ecologic controls on root reinforcement. *Journal of Geophysical Research* **114**,  
313 doi:10.1029/2008JF001168 (2009).
- 314 9 Roering, J. J., Schmidt, K. M., Stock, J. D., Dietrich, W. E. & Montgomery, D. R.  
315 Shallow landsliding, root reinforcement, and the spatial distribution of trees in the  
316 Oregon Coast Range. *Canadian Geotechnical Journal* **40**, 237-253 (2003).
- 317 10 Schwarz, M., Cohen, D. & Or, D. Spatial characterization of root reinforcement at stand  
318 scale: Theory and case study. *Geomorphology* **171-172**, 190-200 (2012).
- 319 11 Douglass, J. E. & Hoover, M. D. in *Forest Hydrology and Ecology at Coweeta* (eds  
320 W.T. Swank & D.A. Crossley) 17-31 (Springer, 1988).
- 321 12 Eschner, A. R. & Patric, J. H. Debris avalanches in Eastern upland forests. *Journal of*  
322 *Forestry* **80**, 343-347 (1982).
- 323 13 Clark, G. M. Debris slide and debris flow historical events in the Appalachians south of  
324 the glacial border. *Reviews in Engineering Geology* **7**, 125-138 (1987).
- 325 14 Wooten, R. M. *et al.* Geologic, geomorphic, and meteorological aspects of debris flows  
326 triggered by Hurricanes Frances and Ivan during September 2004 in the Southern  
327 Appalachian Mountains of Macon County, North Carolina (southeastern USA).  
328 *Landslides* **5**, 31-44 (2008).

- 329 15 Wooten, R. M. *et al.* in *N.C. Geological Survey Geologic Hazards Map Series 1*  
330 (Raleigh, North Carolina, 2006).
- 331 16 Latham, R. S., Wooten, R. M. & Reid, J. C. in *Proceedings of the 56th Highway Geology*  
332 *Symposium*. 277-290.
- 333 17 Selby, M. J. *Hillslope materials and processes*. 2 edn, (Oxford University Press, 1993).
- 334 18 Hales, T. C. & Miniati, C. F. Hillslope-scale root cohesion driven by soil moisture  
335 conditions. *Earth Surface Processes and Landforms*, in review (2016).
- 336 19 Wu, T. H., McKinnell III, W. P. & Swanston, D. N. Strength of tree roots and landslides  
337 on Prince of Wales Island, Alaska. *Canadian Geotechnical Journal* **16**, 19-34 (1979).
- 338 20 Amoozegar, A. A compact constant-head permeameter for measuring saturated hydraulic  
339 conductivity of the vadose zone. *Soil Science Society of America Journal* **53**, 1356-1361  
340 (1989).
- 341 21 North Carolina Flood Mapping Program. 6 m LiDAR elevation model. (2014).
- 342 22 Hurst, M. D., Mudd, S. M., Yoo, K., Attal, M. & Walcott, R. Influence of lithology on  
343 hillslope morphology and response to tectonic forcing in the northern Sierra Nevada of  
344 California. *Journal of Geophysical Research: Earth Surface* **118**, 832-851 (2013).
- 345 23 Jungers, M. C. *et al.* Tracing hillslope sediment production and transport with in situ and  
346 meteoric <sup>10</sup>Be. *Journal of Geophysical Research: Earth Surface* **114**, F04020,  
347 doi:10.1029/2008JF001086 (2009).
- 348 24 Dietrich, W. E., Wilson, C. J. & Reneau, S. L. in *Hillslope Processes* (ed A. D.  
349 Abrahams) 361-388 (Allen and Unwin, 1986).
- 350 25 D'Odorico, P. & Fagherazzi, S. A probabilistic model of rainfall-triggered shallow  
351 landslides in hollows: A long-term analysis. *Water Resources Research* **39** (2003).
- 352 26 Culling, W. E. H. Analytical Theory of Erosion. *Journal of Geology* **68**, 336-344 (1960).
- 353 27 O'Loughin, C. L. & Pearce, A. J. Influence of Cenozoic geology on mass movement and  
354 sediment yield response to forest removal, North Westland, New Zealand. *Bull. Int.*  
355 *Assoc. Eng. Geol.* **14**, 41-46 (1976).
- 356 28 Sidle, R. C. & Swanson, D. N. Analysis of a small debris slide in coastal Alaska. *Can.*  
357 *Geotech. J.* **19**, 167-174 (1982).
- 358 29 Trustrum, N. A. & De Rose, R. C. Soil depth-age relationship of landslides on deforested  
359 hillslopes, Taranaki, New Zealand. *Geomorphology* **1**, 143-160 (1988).
- 360 30 Terzaghi, K. & Peck, R. B. *Soil mechanics in engineering practice*. (Wiley Intersci,  
361 1967).
- 362 31 Haneberg, W. C. A rational probabilistic method for spatially distributed landslide  
363 hazard assessment. *Environmental and Engineering Geoscience* **10** (2004).
- 364 32 Milledge, D. G., Griffiths, D. V., Lane, S. N. & Warburton, J. Limits on the validity of  
365 infinite length assumptions for modelling shallow landslides. *Earth Surface Processes*  
366 *and Landforms* **37**, 1158-1166, doi:10.1002/esp.3235 (2012).
- 367 33 Sidle, R. C., Pearce, A. J. & O'Loughlin, C. L. *Hillslope Stability and Land Use*. (AGU,  
368 1985).
- 369 34 Schmidt, K. *et al.* The variability of root cohesion as an influence on shallow landslide  
370 susceptibility in the Oregon Coast Range. *Canadian Geotechnical Journal* **38**, 995-1024  
371 (2001).
- 372 35 Tarolli, P. & Tarboton, D. G. A new method for determination of most likely landslide  
373 initiation points and the evaluation of digital terrain model scale in terrain stability  
374 mapping. *Hydrology and Earth System Sciences* **10**, 663-677 (2006).

375 36 Montgomery, D. R., Schmidt, K. M., Dietrich, W. E. & McKean, J. Instrumental record  
376 of debris flow initiation during natural rainfall: Implications for modeling slope stability.  
377 *Journal of Geophysical Research: Earth Surface (2003–2012)* **114** (2009).  
378 37 Clubb, F. J., Mudd, S. M., Milodowski, D. T., Hurst, M. D. & Slater, L. J. Objective  
379 extraction of channel heads from high-resolution topographic data. *Water Resources*  
380 *Research* **50**, 4283-4304, doi:10.1002/2013WR015167 (2014).  
381 38 D'Odorico, P. & Fagherazzi, S. A probabilistic model of rainfall-triggered shallow  
382 landslides in hollows: A long-term analysis. *Water Resources Research* **39**, 1262,  
383 doi:10.1029/2002WR001595 (2003).  
384 39 Montgomery, D. R., Sullivan, K. & Greenberg, H. M. Regional test of a model for  
385 shallow landsliding. *Hydrological Processes* **12**, 943-955, doi:10.1002/(SICI)1099-  
386 1085(199805)12:6<943::AID-HYP664>3.0.CO;2-Z (1998).  
387 40 Hwang, T. *et al.* Simulating vegetation controls on hurricane-induced shallow landslides  
388 with a distributed ecohydrological model. *Journal of Geophysical Research:*  
389 *Biogeosciences*, 2014JG002824, doi:10.1002/2014JG002824 (2015).  
390 41 Wooten, R. M. *et al.* in *Geological hazards map series 1* (2006).  
391  
392
